# Supplementary material for: Static and Dynamic Prediction of Chronic Renal Disease Progression Using Longitudinal Clinical Data from Taiwan’s National Prevention Programs
Source: MDPI journal article supplement (doi:10.3390/jcm10143085), 2021-07-13
Supplement: s1 [file s1]

**Table S1.** ICD-9-CM code for the two national program.

| ICD-9-CM                                                                                       | Disease coding                                                                                  |
|------------------------------------------------------------------------------------------------|-------------------------------------------------------------------------------------------------|
| NHI reimbursement plans that improve health care quality of early-stage chronic kidney disease |                                                                                                 |
| 016.0                                                                                          | Renal tuberculosis                                                                              |
| 095.4                                                                                          | Syphilis of kidney                                                                              |
| 189.0                                                                                          | Kidney, except pelvis                                                                           |
| 189.9                                                                                          | Urinary organ, site unspecified                                                                 |
| 223.0                                                                                          | Kidney, except pelvis                                                                           |
| 236.91                                                                                         | Kidney and ureter                                                                               |
| 250.4                                                                                          | Diabetes with renal manifestations                                                              |
| 271.4                                                                                          | Renal glycosuria                                                                                |
| 274.1                                                                                          | Gouty nephropathy                                                                               |
| 283.11                                                                                         | Hemolytic-uremic syndrome                                                                       |
| 403                                                                                            | Hypertensive chronic kidney disease                                                             |
| 404                                                                                            | Hypertensive heart and chronic kidney disease                                                   |
| 440.1                                                                                          | Atherosclerosis of renal artery                                                                 |
| 442.1                                                                                          | Other aneurysm of renal artery                                                                  |
| 447.3                                                                                          | Hyperplasia of renal artery                                                                     |
| 572.4                                                                                          | Hepatorenal syndrome                                                                            |
| 580                                                                                            | Acute glomerulonephritis                                                                        |
| 581                                                                                            | Nephrotic syndrome                                                                              |
| 582                                                                                            | Chronic glomerulonephritis                                                                      |
| 583                                                                                            | Nephritis and nephropathy, not specified as acute or chronic                                    |
| 584                                                                                            | Acute renal failure                                                                             |
| 585                                                                                            | Chronic kidney disease (CKD)                                                                    |
| 586                                                                                            | Renal failure, unspecified                                                                      |
| 587                                                                                            | Renal sclerosis, unspecified                                                                    |
| 588                                                                                            | Disorders resulting from impaired renal function                                                |
| 591                                                                                            | Hydronephrosis                                                                                  |
| 642.1                                                                                          | Hypertension secondary to renal disease, complicating pregnancy, childbirth, and the puerperium |
| 646.2                                                                                          | Unspecified renal disease in pregnancy, without mention of hypertension                         |
| 753.12                                                                                         | Polycystic kidney, unspecified type                                                             |
| 753.13                                                                                         | Polycystic kidney, autosomal dominant                                                           |
| 753.14                                                                                         | Polycystic kidney, autosomal recessive                                                          |
| 753.15                                                                                         | Renal dysplasia                                                                                 |
| 753.16                                                                                         | Medullary cystic kidney                                                                         |
| 753.17                                                                                         | Medullary sponge kidney                                                                         |
| 753.19                                                                                         | Other specified cystic kidney disease                                                           |
| 753.2                                                                                          | Obstructive defects of renal pelvis and ureter                                                  |
| 794.4                                                                                          | Kidney (Abnormal renal function test)                                                           |
| NHI Pre-ESRD patient care and education program                                                |                                                                                                 |
| 585                                                                                            | Chronic kidney disease (CKD)                                                                    |
| 581                                                                                            | Nephrotic syndrome                                                                              |

Note: ICD-9-CM = the Ninth revision of the International Classification of Diseases; NHI= National Health Insurance; ESRD = end-stage renal disease.

**Table S2.** The collinearity of variables in the optimal baseline model.

| Variable       | Variance inflation factor |
|----------------|---------------------------|
| Stage 3a CKD   |                           |
| eGFR           | 1.706                     |
| Creatinine     | 1.689                     |
| lnPCR          | 1.015                     |
| Stage 3b-5 CKD |                           |
| eGFR           | 2.672                     |
| Hemoglobin     | 1.921                     |
| Urea nitrogen  | 3.212                     |
| Creatinine     | 2.076                     |
| Sodium         | 1.092                     |
| Calcium        | 1.086                     |
| Phosphate      | 2.401                     |
| Albumin        | 1.684                     |
| lnPCR          | 1.446                     |
| Age            | 1.233                     |

Note: eGFR= estimated glomerular filtration rate; lnPCR =ln urine protein/creatinine; CKD=chronic kidney disease.

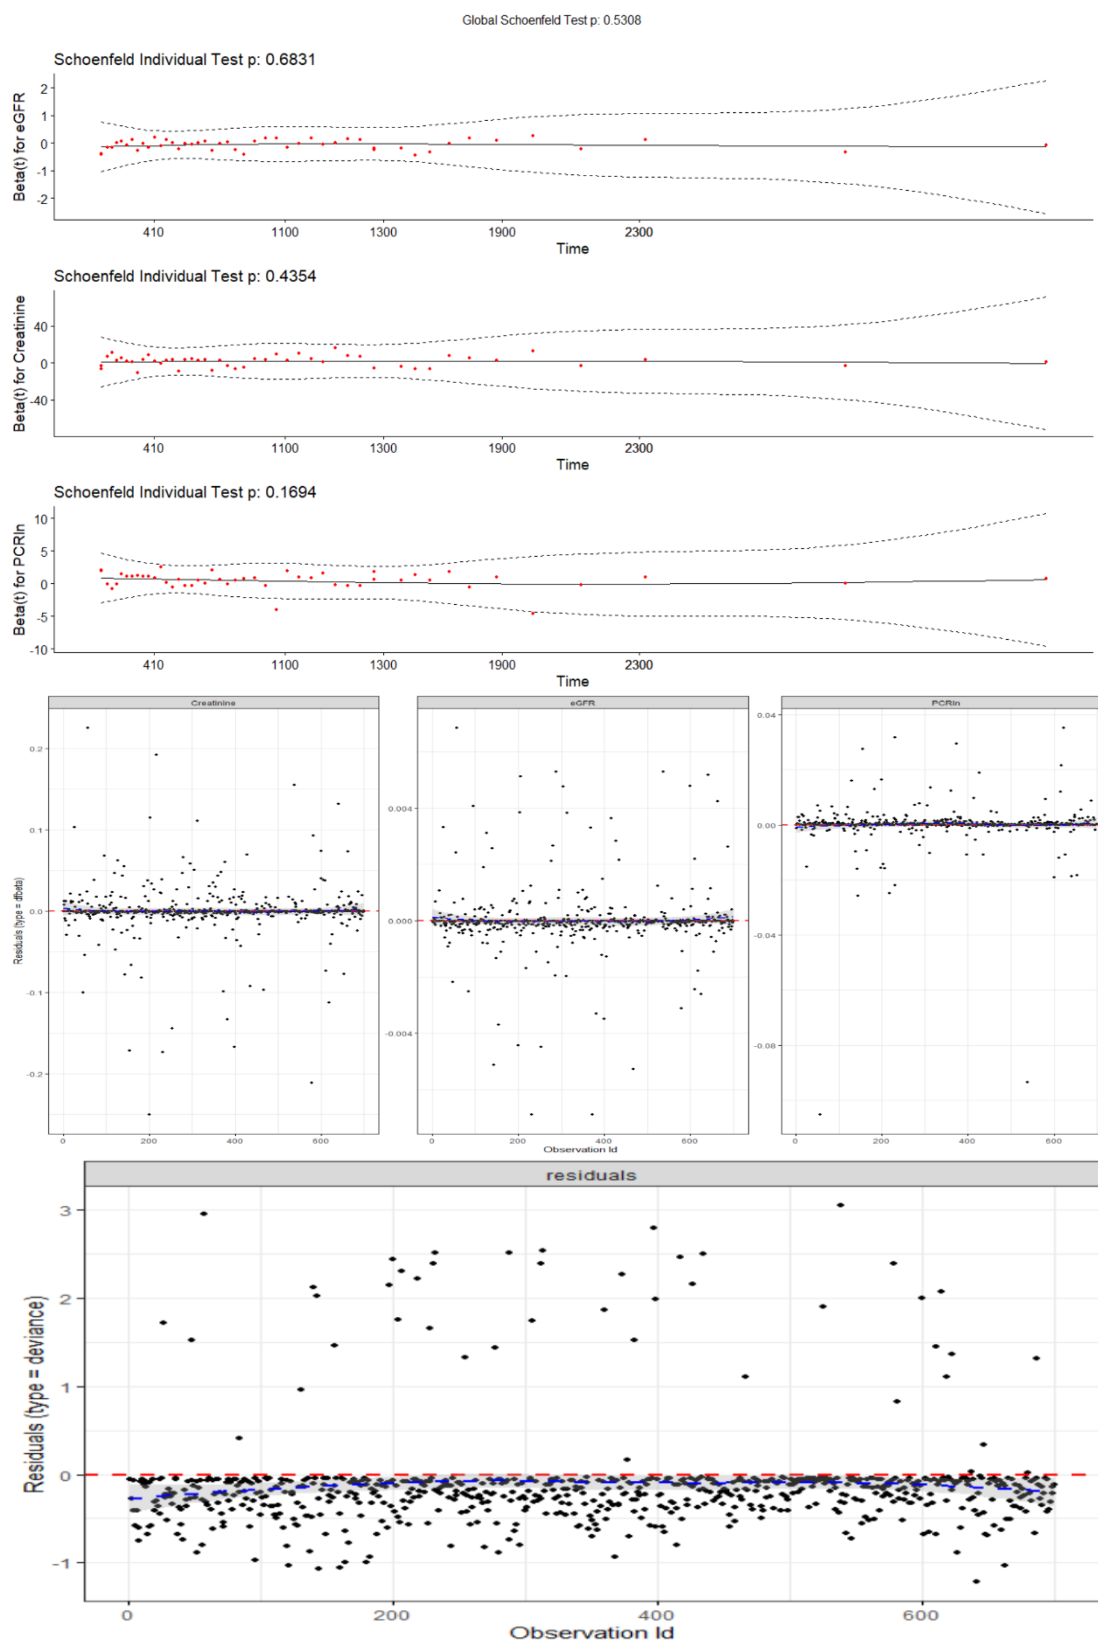

Figure S1. Schoenfeld residual plot of the optimal baseline model in Stage 3a CKD.

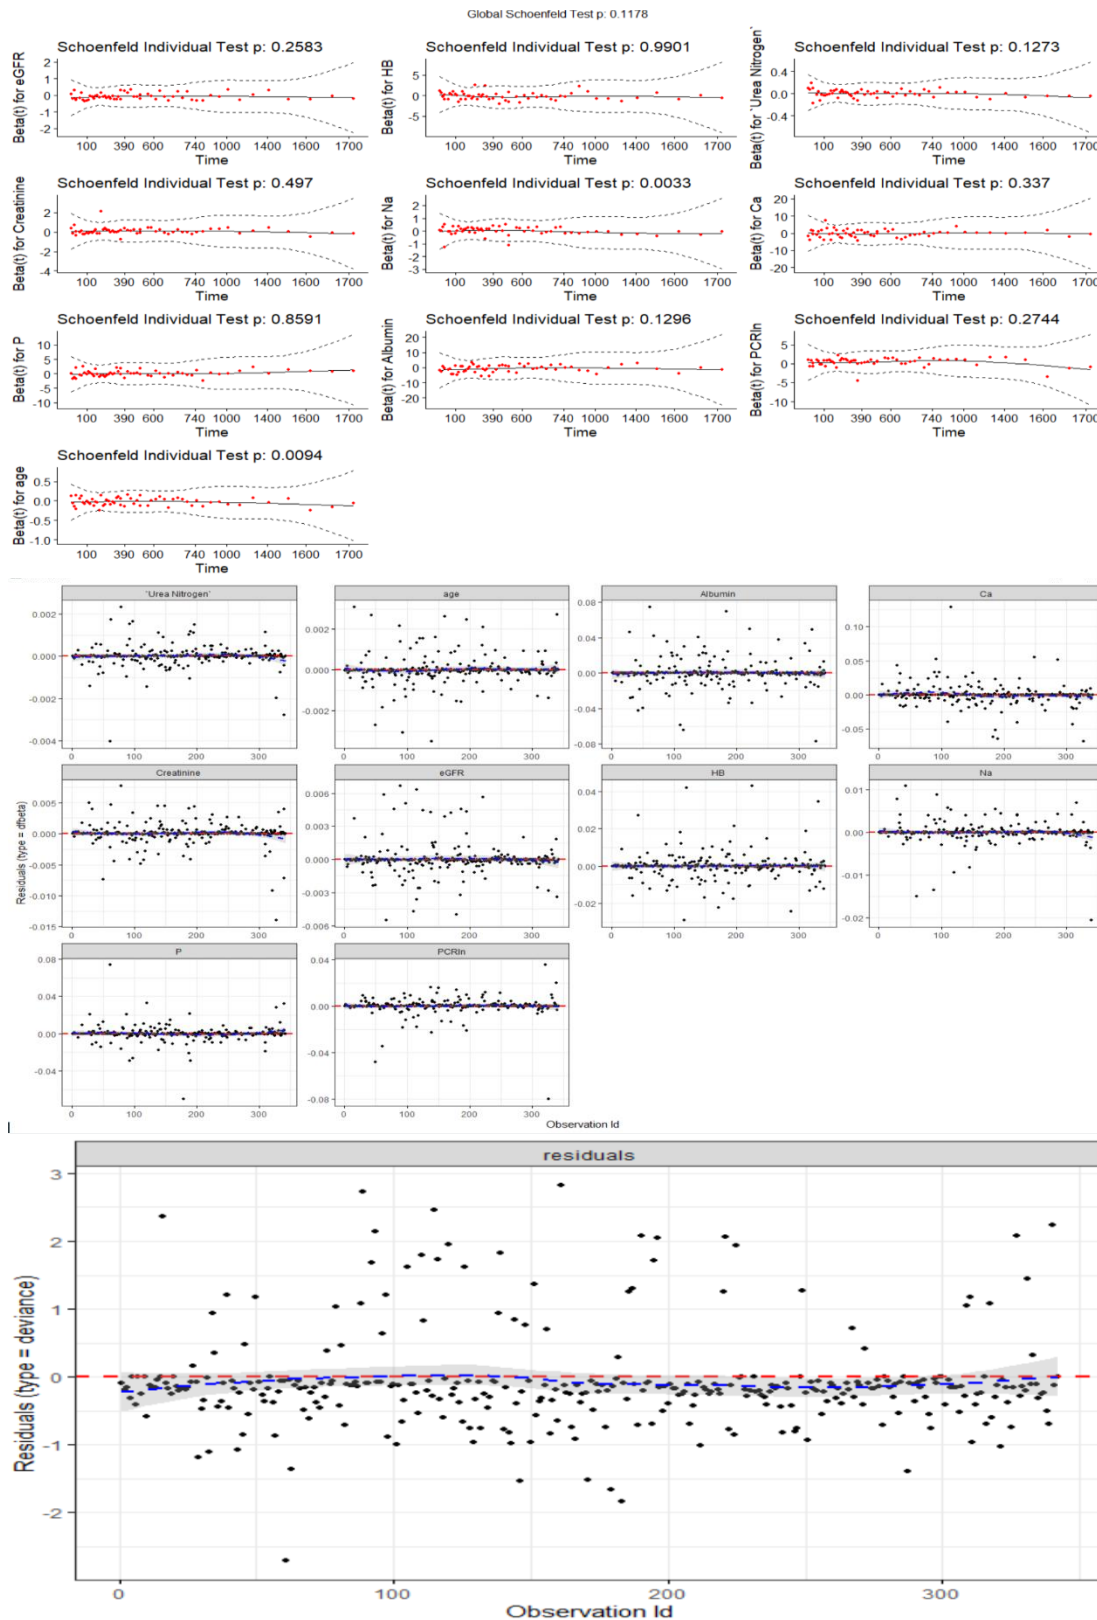

Figure S2. Schoenfeld residual plot of the optimal baseline model in Stage 3b-5 CKD.
